# Supplementary material for: In vitro and in vivo biolasing of fluorescent proteins suspended in liquid microdroplet cavities
Source: Royal Society of Chemistry journal article supplement (doi:10.1039/c4lc00485j), 2014-01-01
Supplement: c4lc00485j4.pdf [file c4lc00485j4.pdf]

### **Video1**

Title: Moving bacteria suspended in liquid microdroplets (DIC imaging)

Caption: Diffusive motion of *E. Coli* bacteria suspended in water-glycerol liquid microdroplet deposited on a superhydrophobic surface (DIC imaging). Image acquisition time: 70 ms.

Video frame rate: 12.5 frames per second.

Keywords: bacteria lasing, biological gain medium, yellow fluorescent protein, optofluidics, droplet-based microcavities, superhydrophobic surfaces

### **Video2**

Title: Moving bacteria suspended in liquid microdroplets (fluorescence imaging)

Caption: Diffusive motion of *E. Coli* bacteria suspended in water-glycerol liquid microdroplet deposited on a superhydrophobic surface (fluorescence imaging). Image acquisition time: 70 ms. Video frame rate: 12.5 frames per second.

Keywords: bacteria lasing, biological gain medium, yellow fluorescent protein, optofluidics, droplet-based microcavities, superhydrophobic surfaces
